# Supplementary material
Source: Elsevier journal article supplement (https://comptes-rendus.academie-sciences.fr/chimie/article/10.1016/j.crci.2007.04.010/file/attach/mmc1.pdf)
Supplement: mmc1 [file mmc1.pdf]

**Instability of actinide(IV) hexachlorocomplexes in room-temperature ionic liquid [BuMeIm]PF<sub>6</sub> due to hydrolysis of hexafluorophosphate anion**

*Sergey I.Nikitenko<sup>a</sup>, Claude Berthon<sup>b</sup>, Philippe Moisy<sup>b\*</sup>*

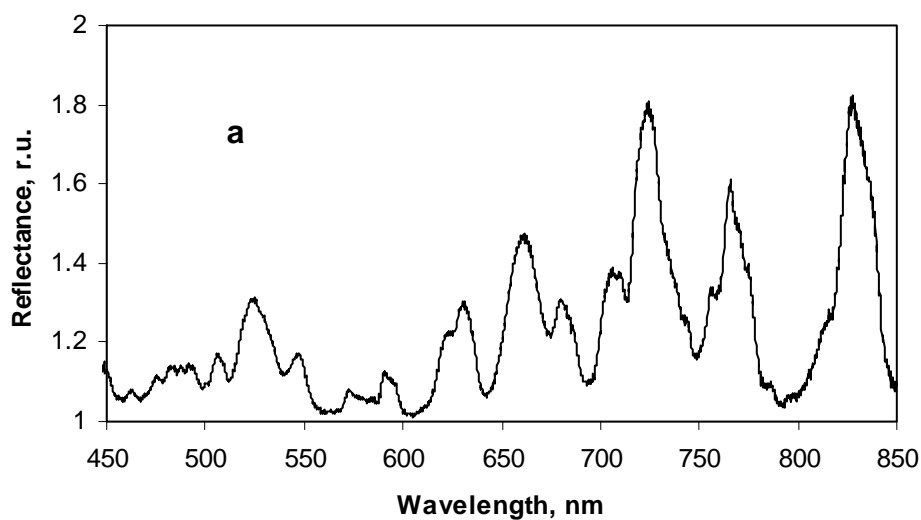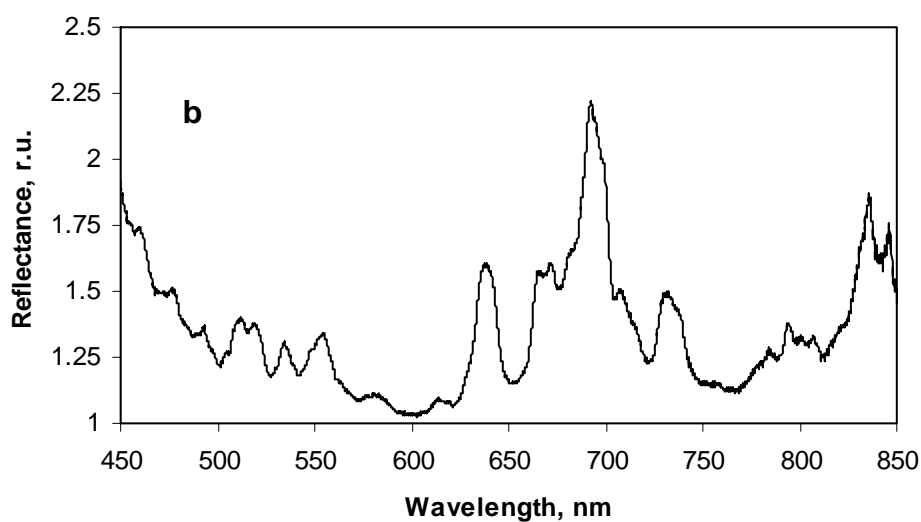

Solid-state reflectance spectra of [BuMeIm]<sub>2</sub>[NpCl<sub>6</sub>] (a) and [BuMeIm]<sub>2</sub>[PuCl<sub>6</sub>] (b).

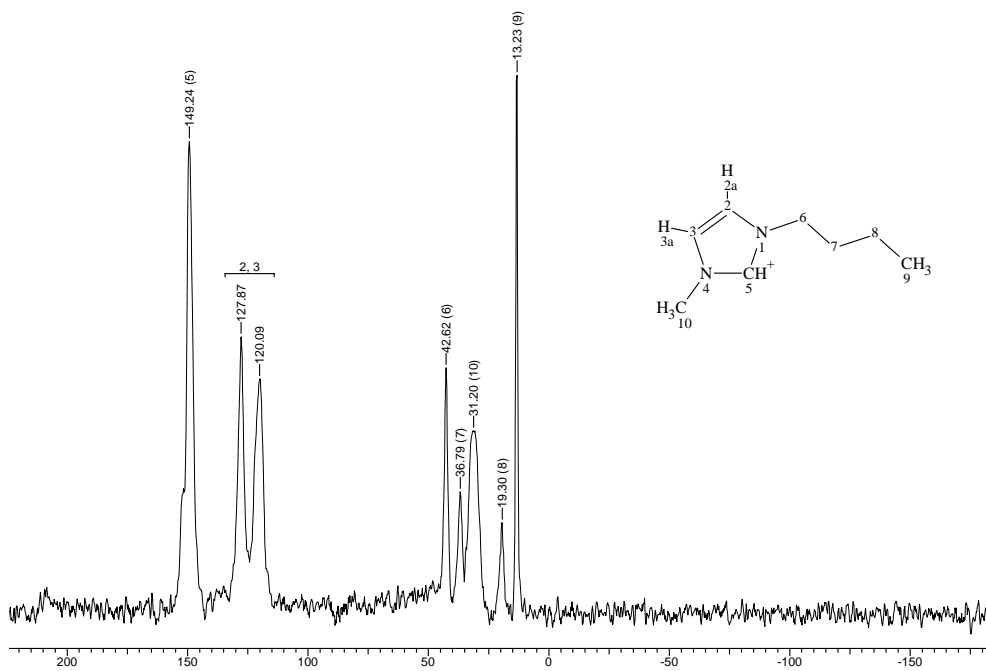

$^{13}\text{C}$  NMR spectra of the solids precipitated from  $[\text{ThCl}_6]^{2-}$  solutions in  $[\text{BuMeIm}]\text{PF}_6$ .
